# Supplementary figures and images for: The role and molecular mechanism of D-aspartic acid in the release and synthesis of LH and testosterone in humans and rats
Source: Springer Nature journal article supplement (doi:10.1186/1477-7827-7-120), 2009-10-27

## LH content in rat pituitary

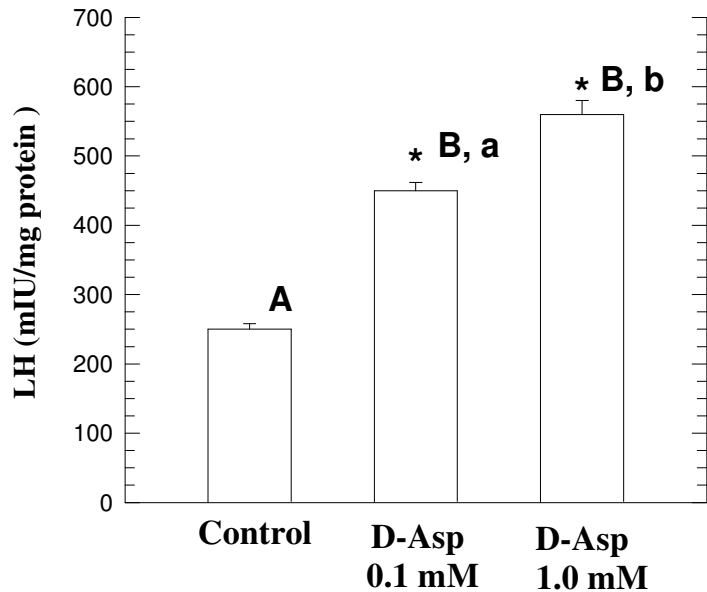

## cGMP content in rat pituitary

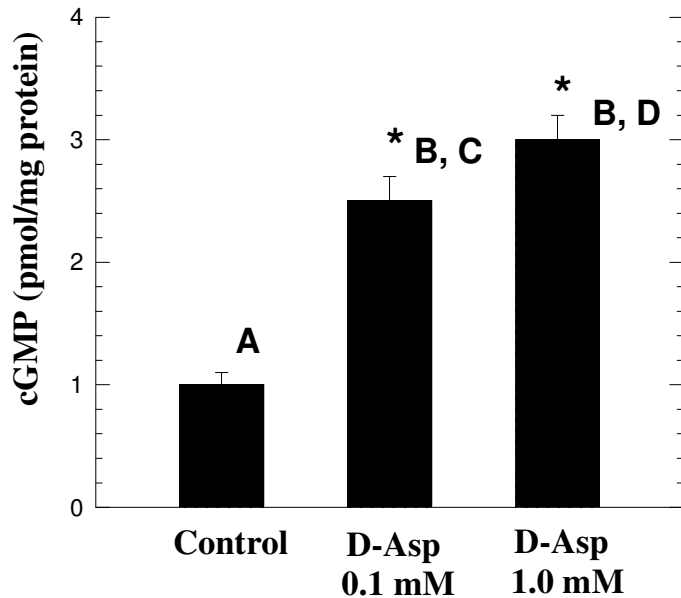

Supplement: 12958_2009_592_MOESM2_ESM.pdf [file 12958_2009_592_MOESM2_ESM.pdf]
